# Supplementary material for: Allosteric and transport modulation of human concentrative nucleoside transporter 3 at the atomic scale
Source: Royal Society of Chemistry journal article supplement (doi:10.1039/d1cp03756k), 2021-01-01
Supplement: d1cp03756k2.pdf [file d1cp03756k2.pdf]

## Supplemental Material

### Allosteric and transport modulation of human concentrative nucleoside transporter 3 at the atomic scale

Huaichuan Duan<sup>1,†</sup>, Yanxia Zhou<sup>2,†</sup>, Xiaodong Shi<sup>1,†</sup>, Jiaying Gao<sup>1</sup>, LiLiang<sup>1</sup>, WeiLiu<sup>1</sup>, Lianxin Peng<sup>1</sup>, Dong Deng<sup>2,\*</sup>, Jianping Hu<sup>1,\*</sup>

<sup>1</sup> School of Pharmacy, Sichuan Industrial Institute of Antibiotics, Chengdu University, Chengdu, China;

<sup>2</sup> Key Laboratory of Birth Defects and Related Disease of Women and Children of MOE, State Key Laboratory of Biotherapy, Department of Obstetrics, West China Second Hospital, Sichuan University, Chengdu, China

<sup>†</sup> These authors contributed equally to this work.

\* For correspondence: Dong Deng, dengd@scu.edu.cn; Jianping Hu, hjpcdu@163.com

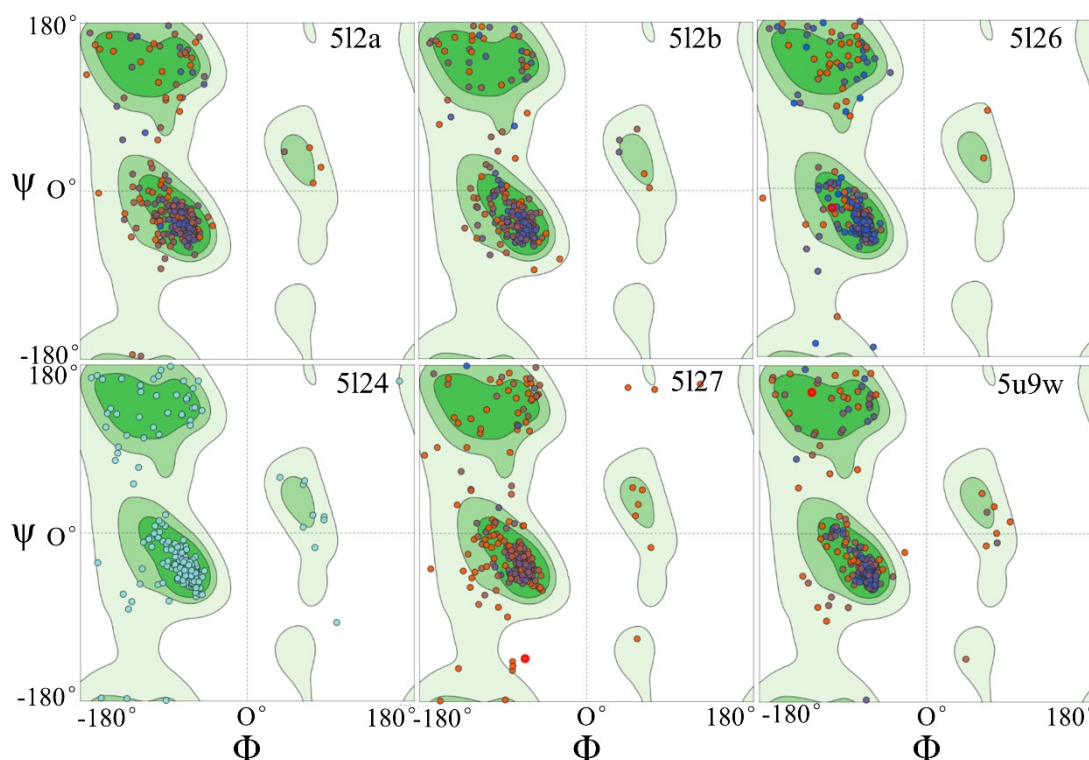

Figure S1 Ramachandran plots of CNT<sub>NW</sub> model. Modelling quality from high to low is 5L26, 5L24, 5L2b, 5U9W, 5L2A and 5L27, with Q values of -3.09, -3.98, -4.39, -4.51, -5.10 and -7.09, respectively.

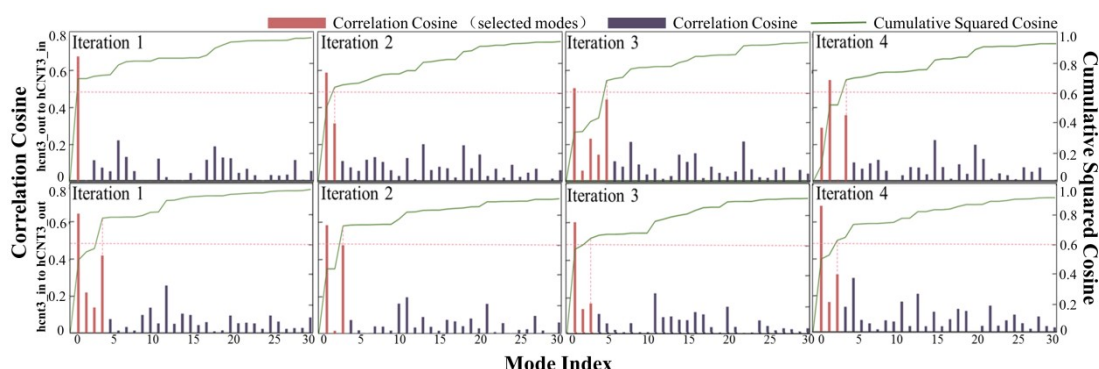

Figure S2 Correlation cosine between instantaneous distance vector and eigenmodes. Results are illustrated for aANM at the first 4 iterations, where the collection of intermediate conformations respectively starts with the outward-facing (i.e., hCNT3\_out, the top 4 panels) and inward-fac structures (i.e., hCNT3\_in, the bottom 4 panels) and approaches each other.

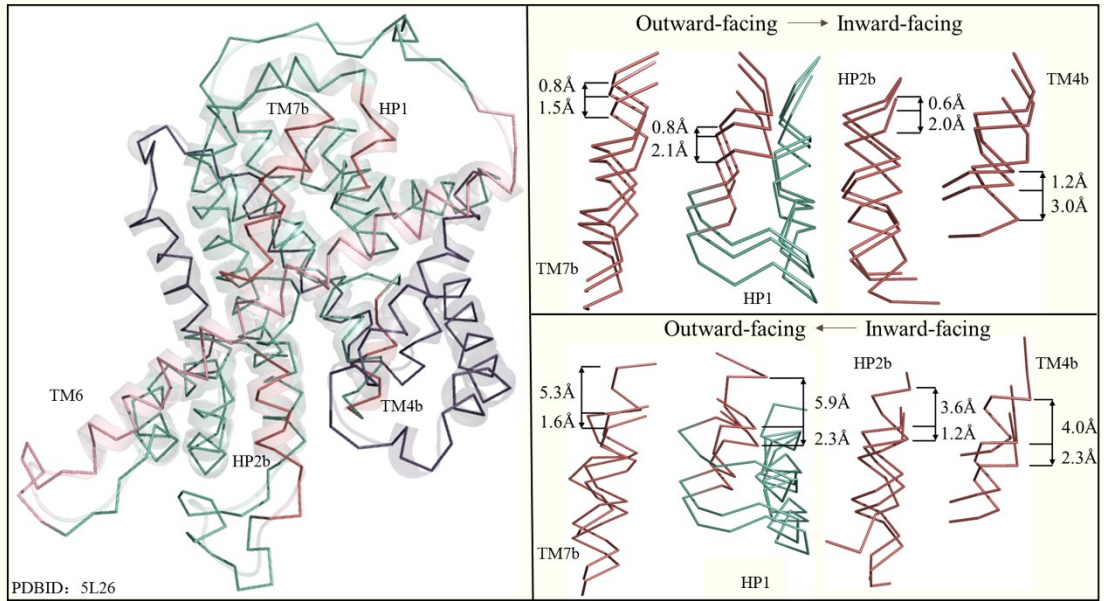

Figure S3 The offset distance of nucleoside transport channel during the transition from hCNT3\_out and hCNT3\_in to hCNT3\_mid
